# Supplementary material for: Enhanced target-specific delivery of docetaxel-loaded nanoparticles using engineered T cell receptors
Source: Royal Society of Chemistry journal article supplement (doi:10.1039/d1nr04001d), 2021-01-01
Supplement: d1nr04001d1.pdf [file d1nr04001d1.pdf]

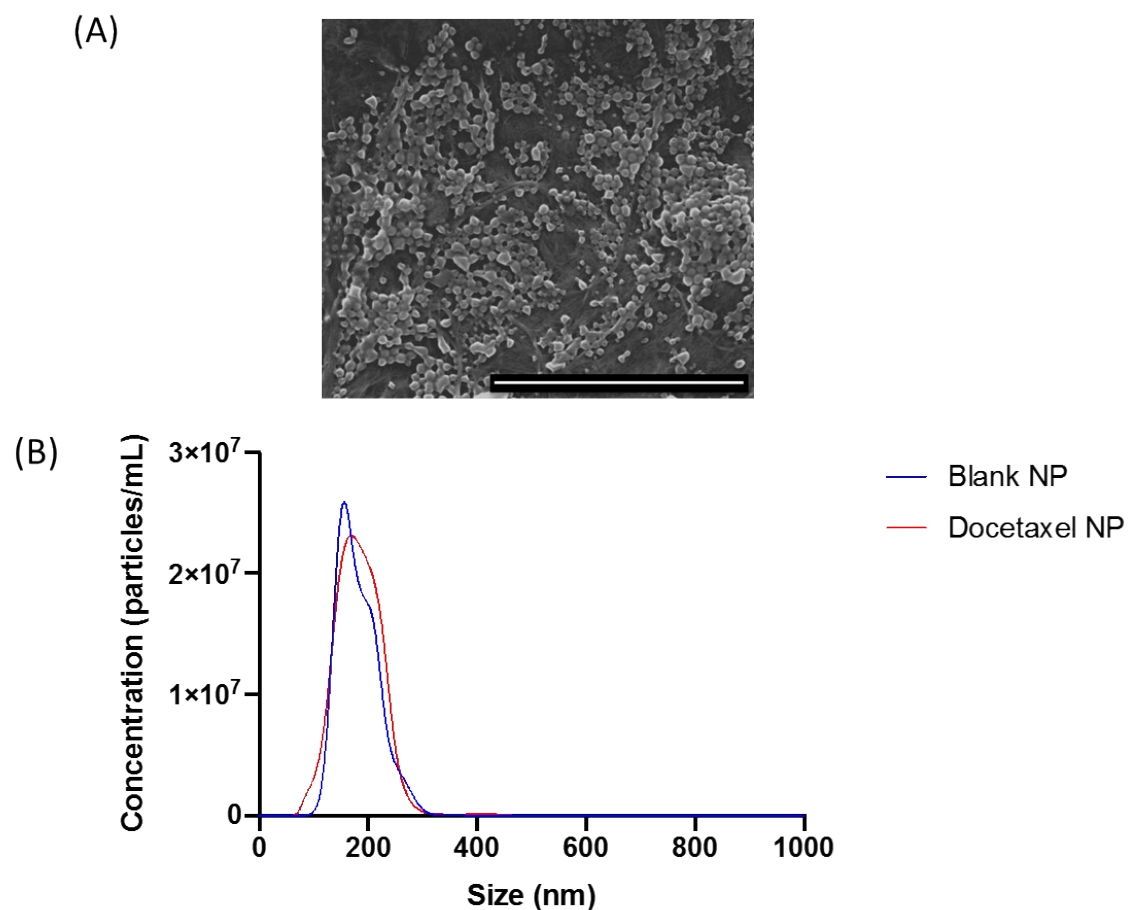

**Supplementary Figure 1 – Characterisation of blank-NPs and DTX-NPs.** (A) Scanning electron micrograph of blank PEGylated maleimide nanoparticles. Scale bar = 5  $\mu$ M. (B) Characterisation of size of blank-NPs and DTX-NPs by Nanosight
